# Supplementary material
Source: publisher figshare collection journal article supplement (https://tandf.figshare.com/articles/dataset/_/14815504)

A. 90% missing taxa/locus

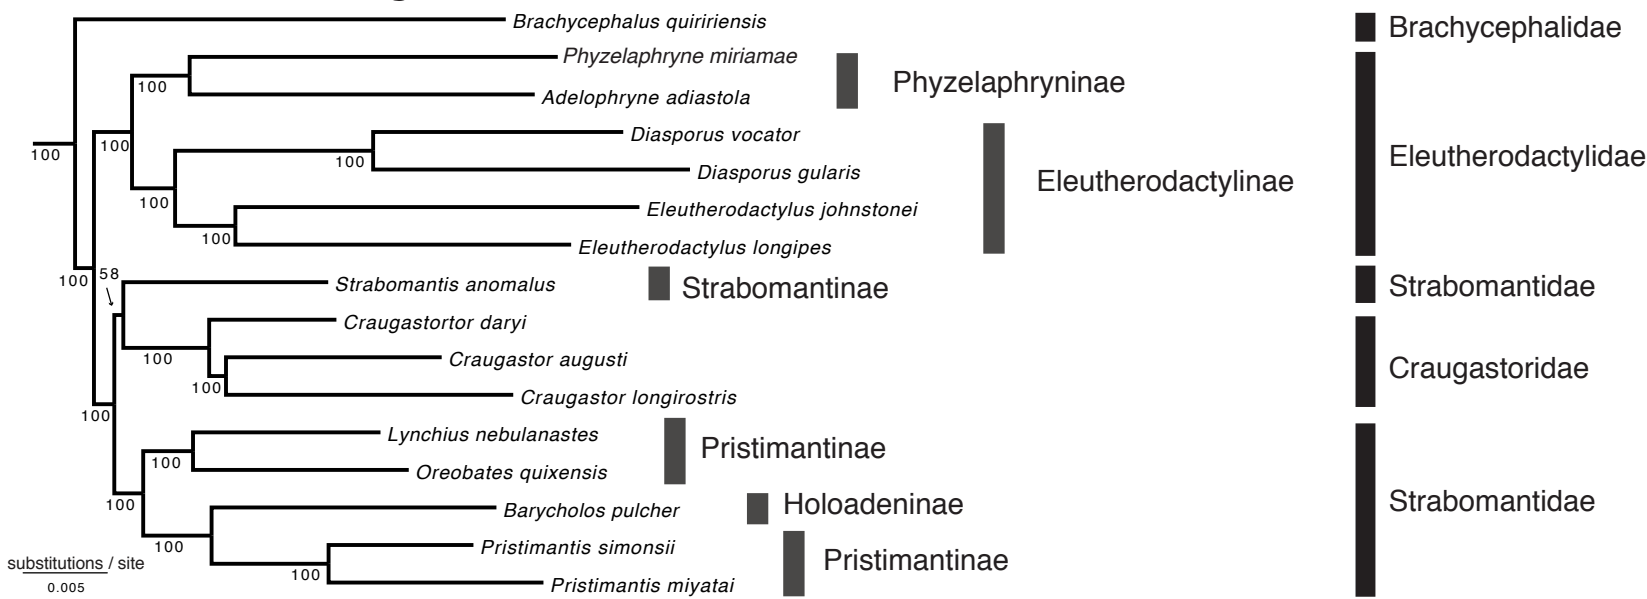

B. 70% missing taxa/locus

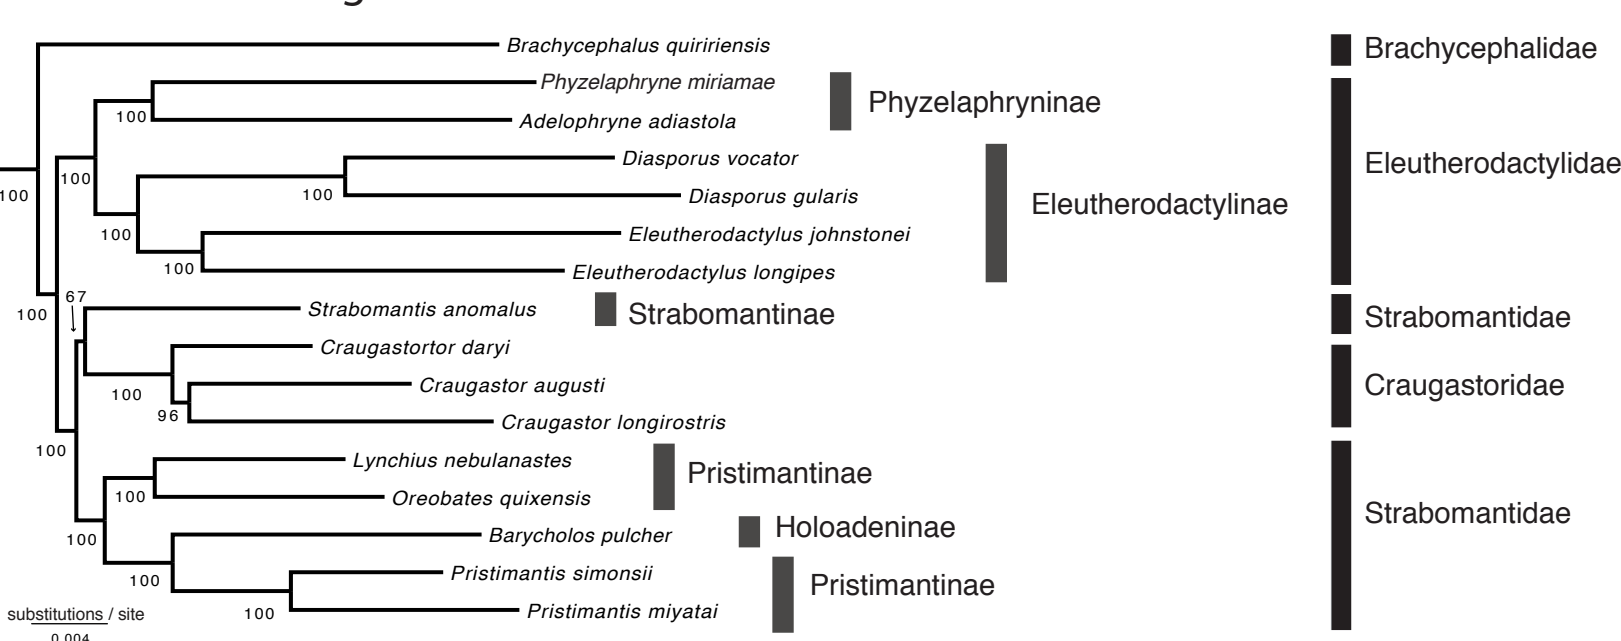

C. 60% missing taxa/locus

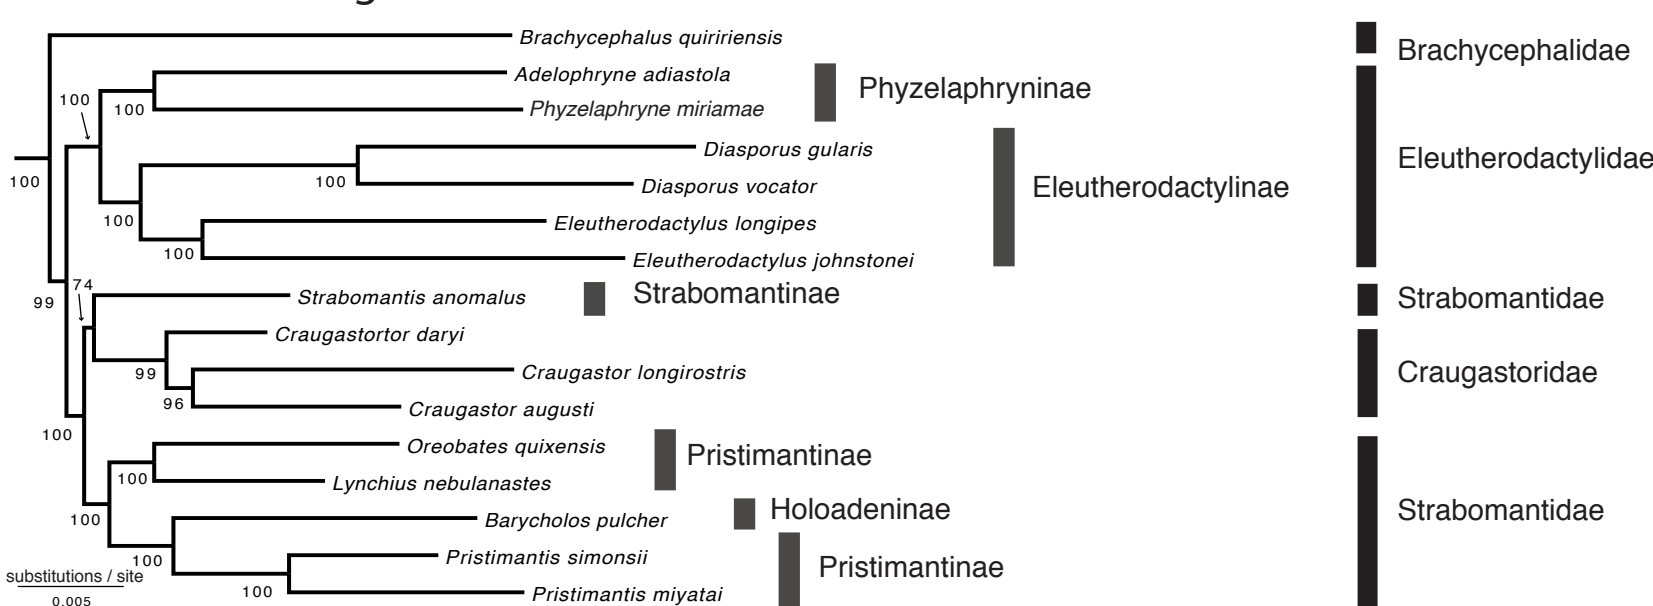

D. 50% missing taxa/locus

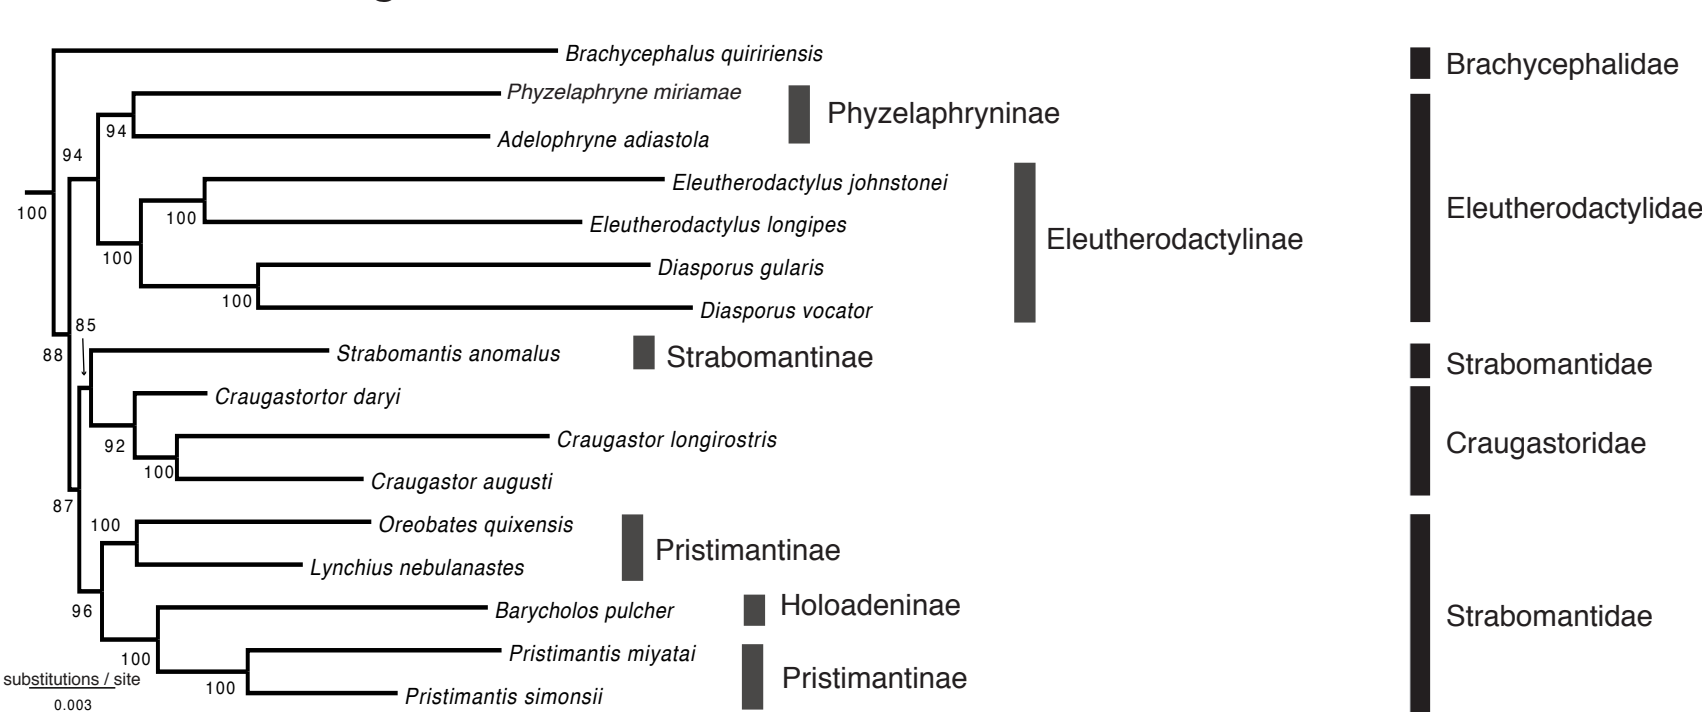

E. 40% missing taxa/locus

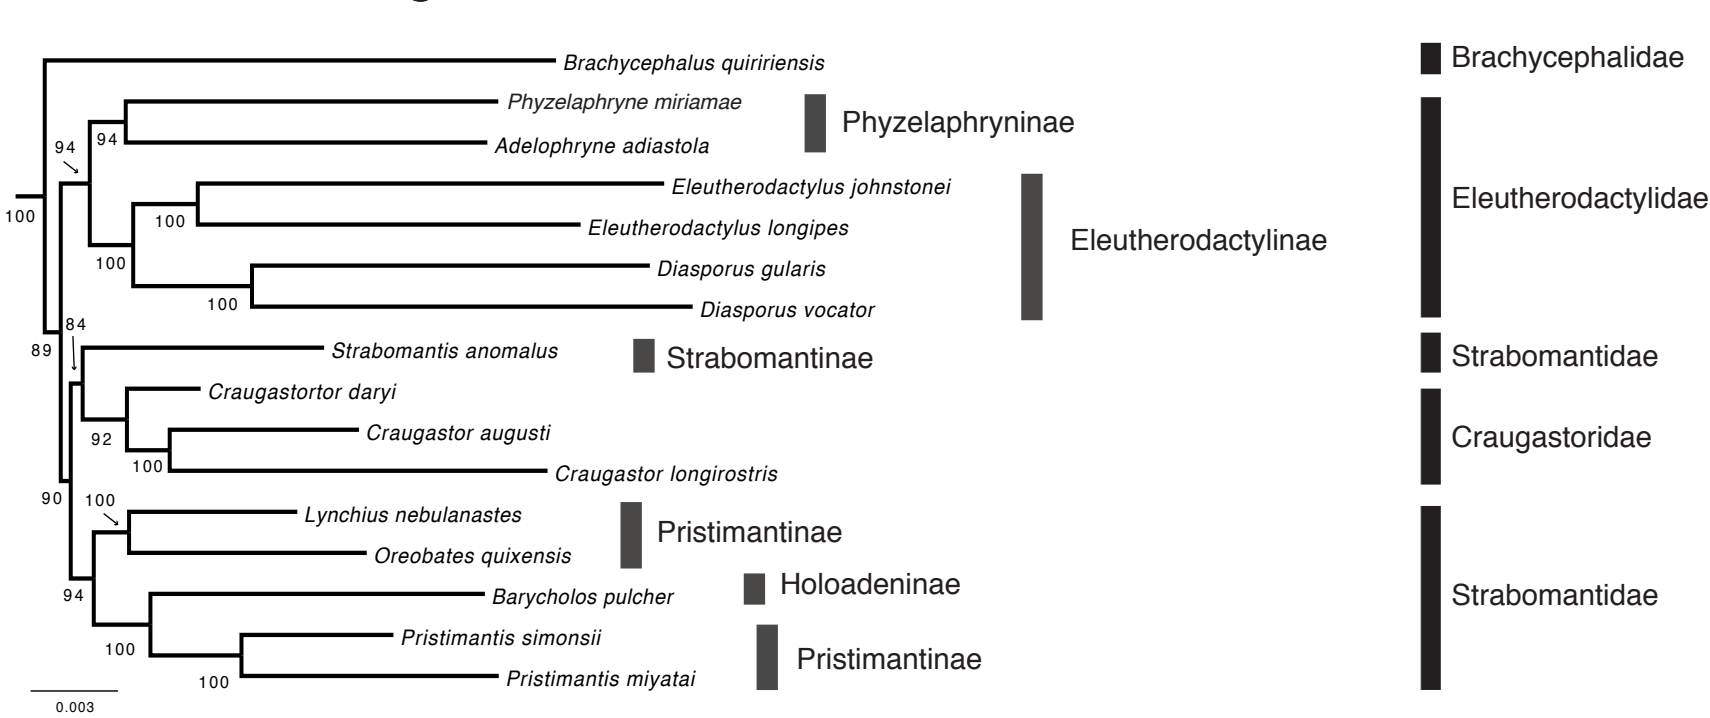

F. 30% missing taxa/locus

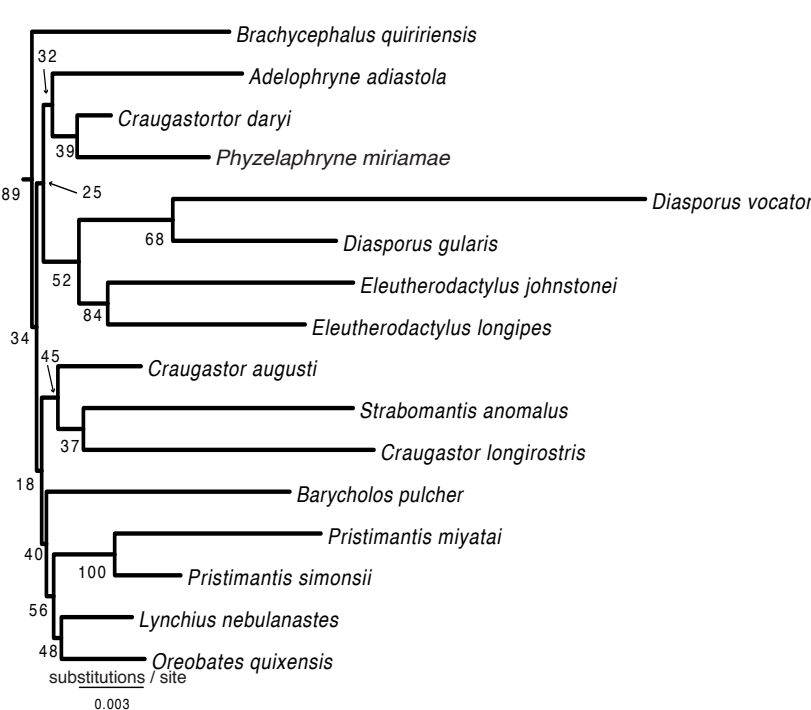

G. 20% missing taxa/locus

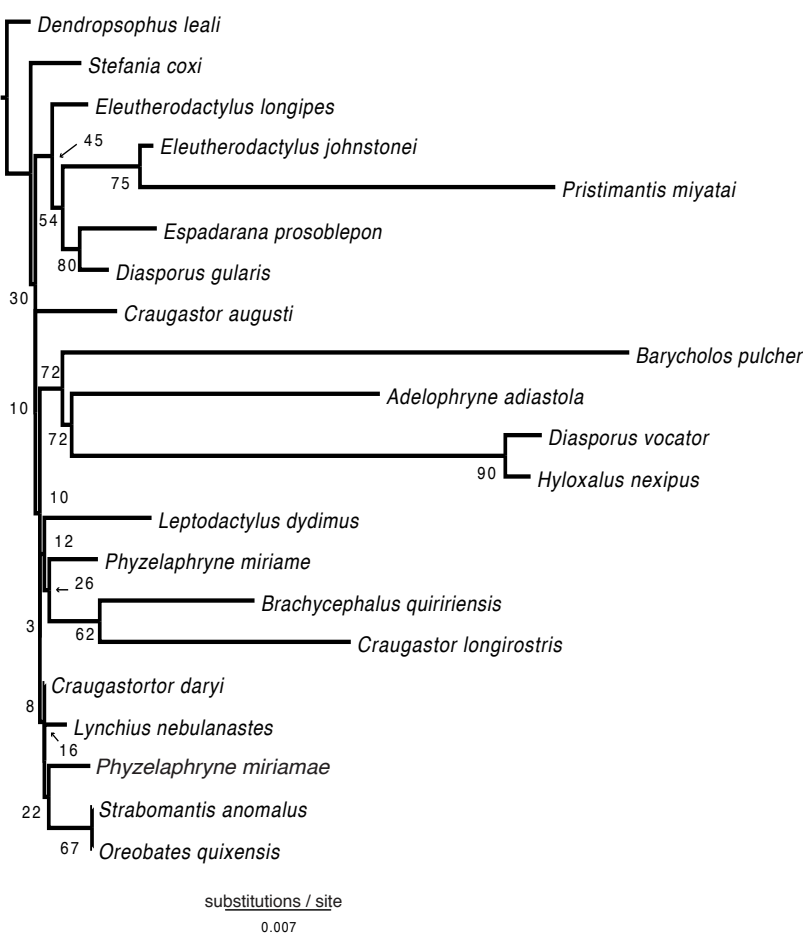

H. 10% missing taxa/locus

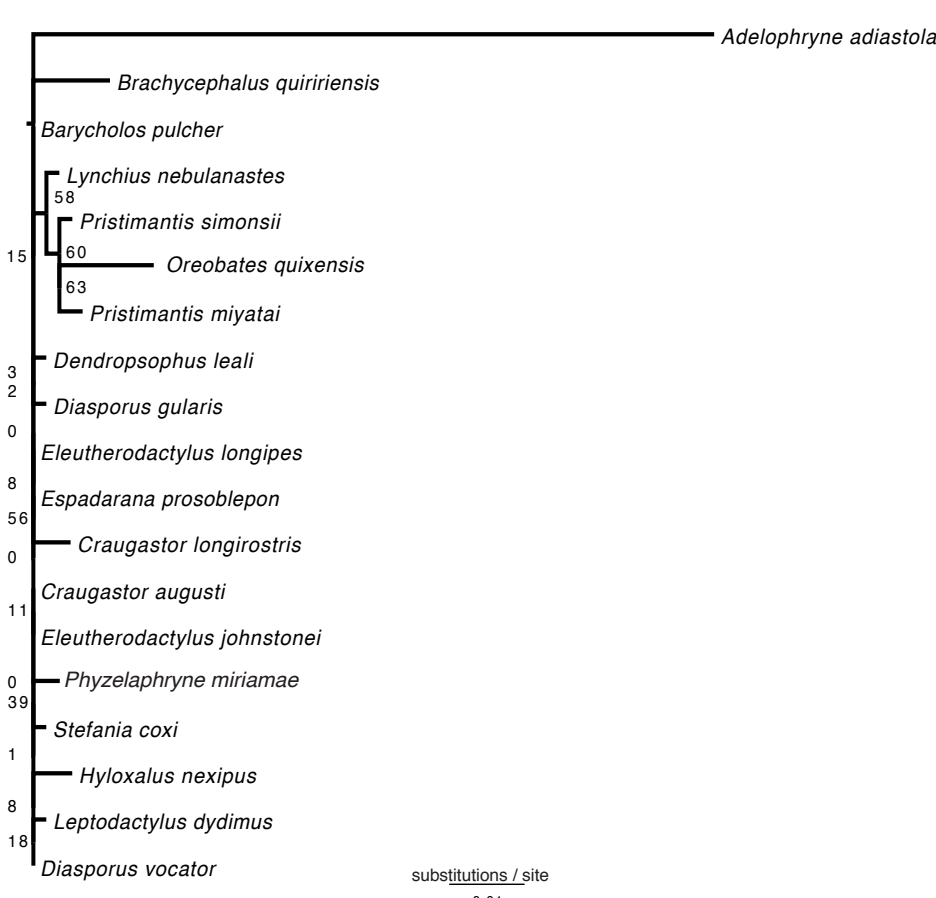

Supplement: Supplementary file 1 [file 1]
