# Supplementary material
Source: publisher figshare collection journal article supplement (https://tandf.figshare.com/articles/dataset/_/14815504)

A. RAXML 80% missing taxa/locus

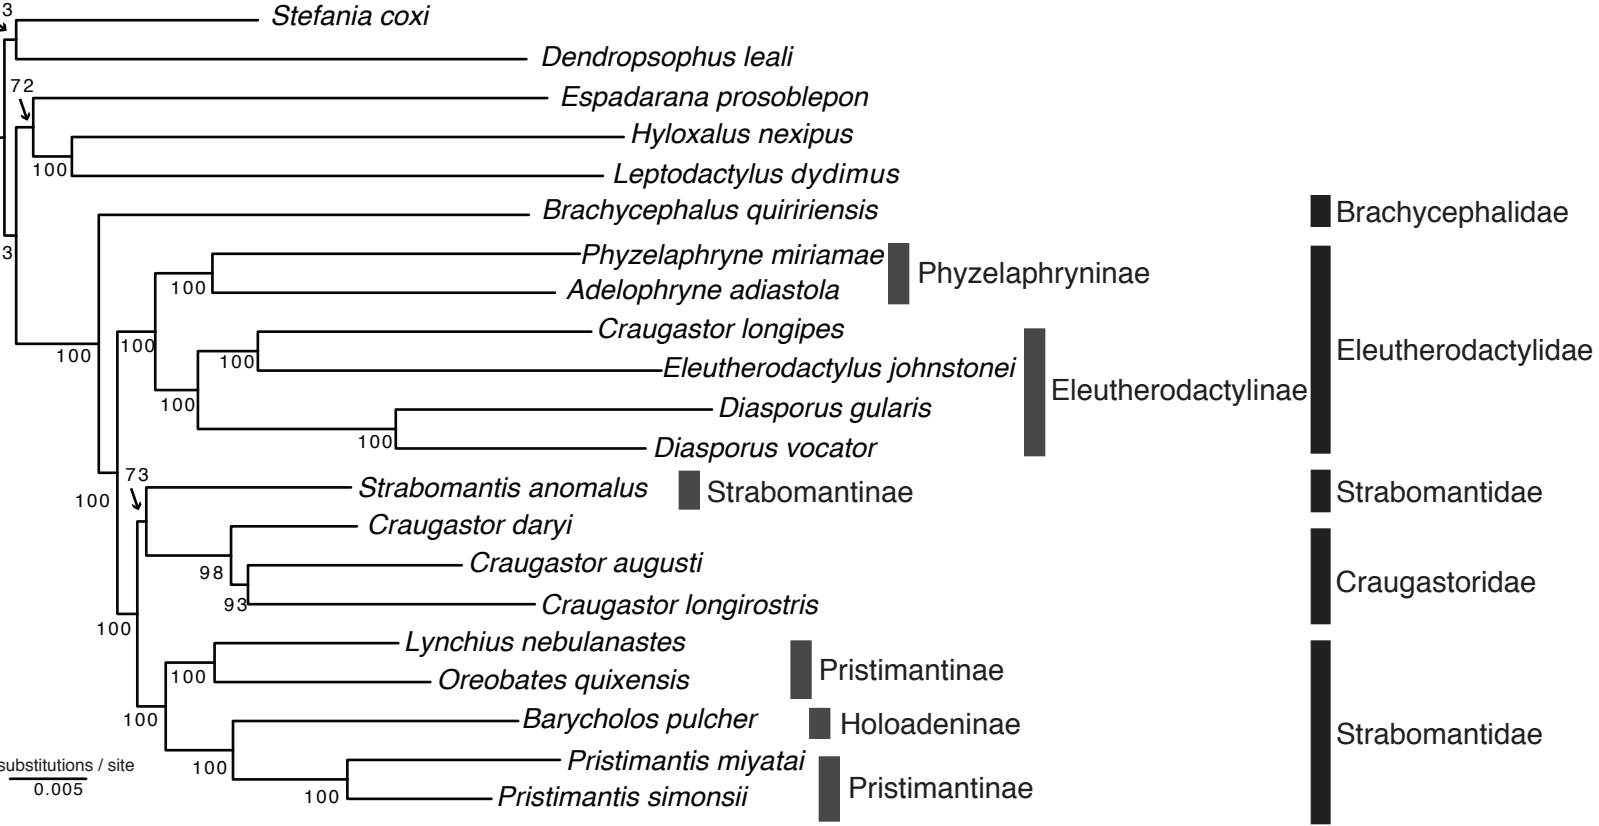

B. NJst 80% missing taxa/locus

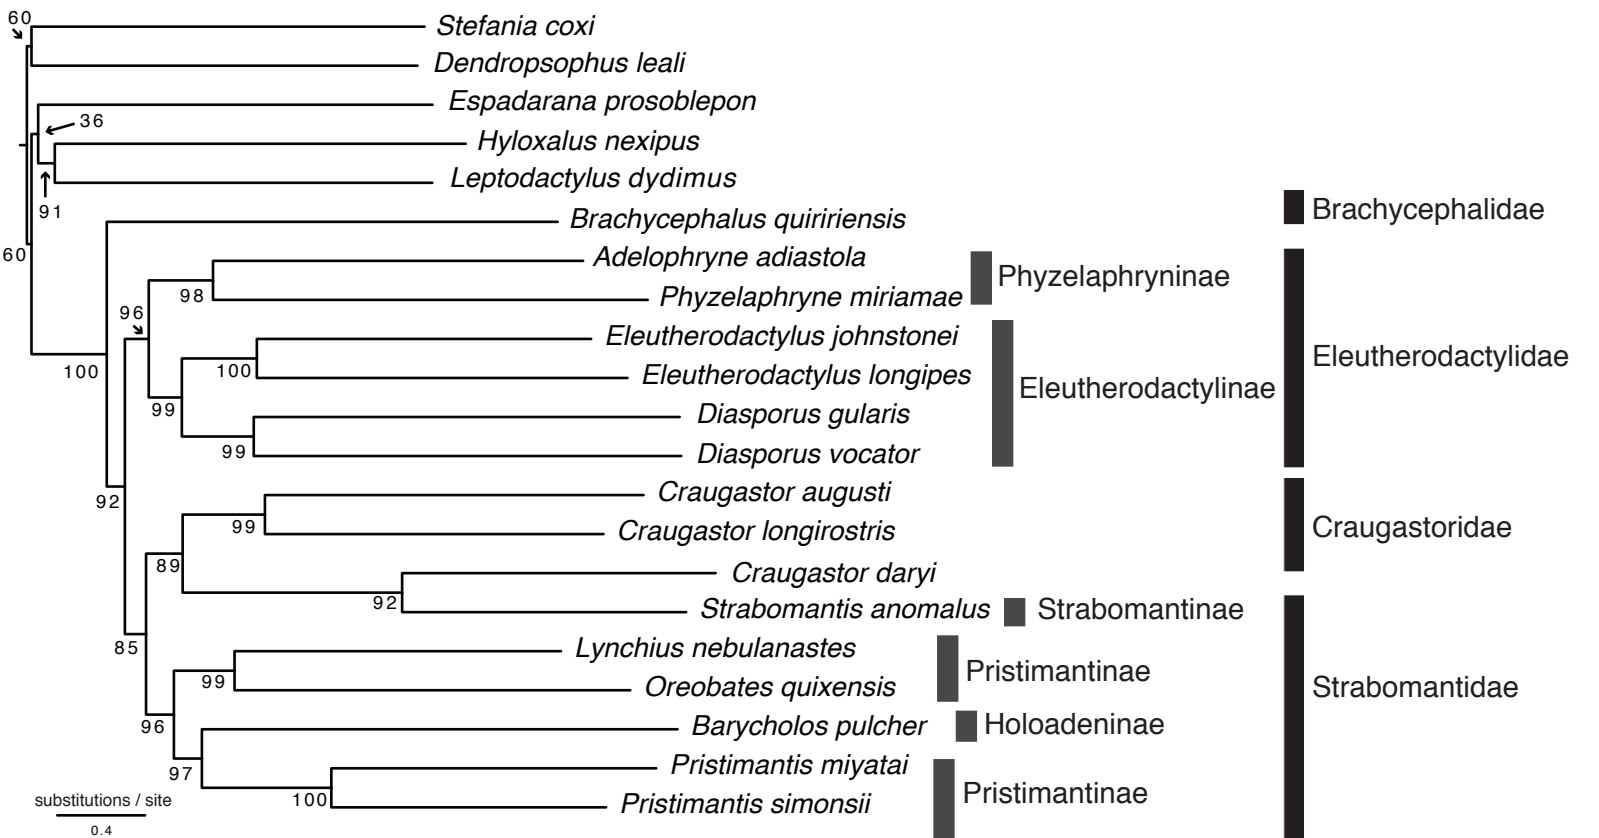

C. ASTRAL-II 80% missing taxa/locus

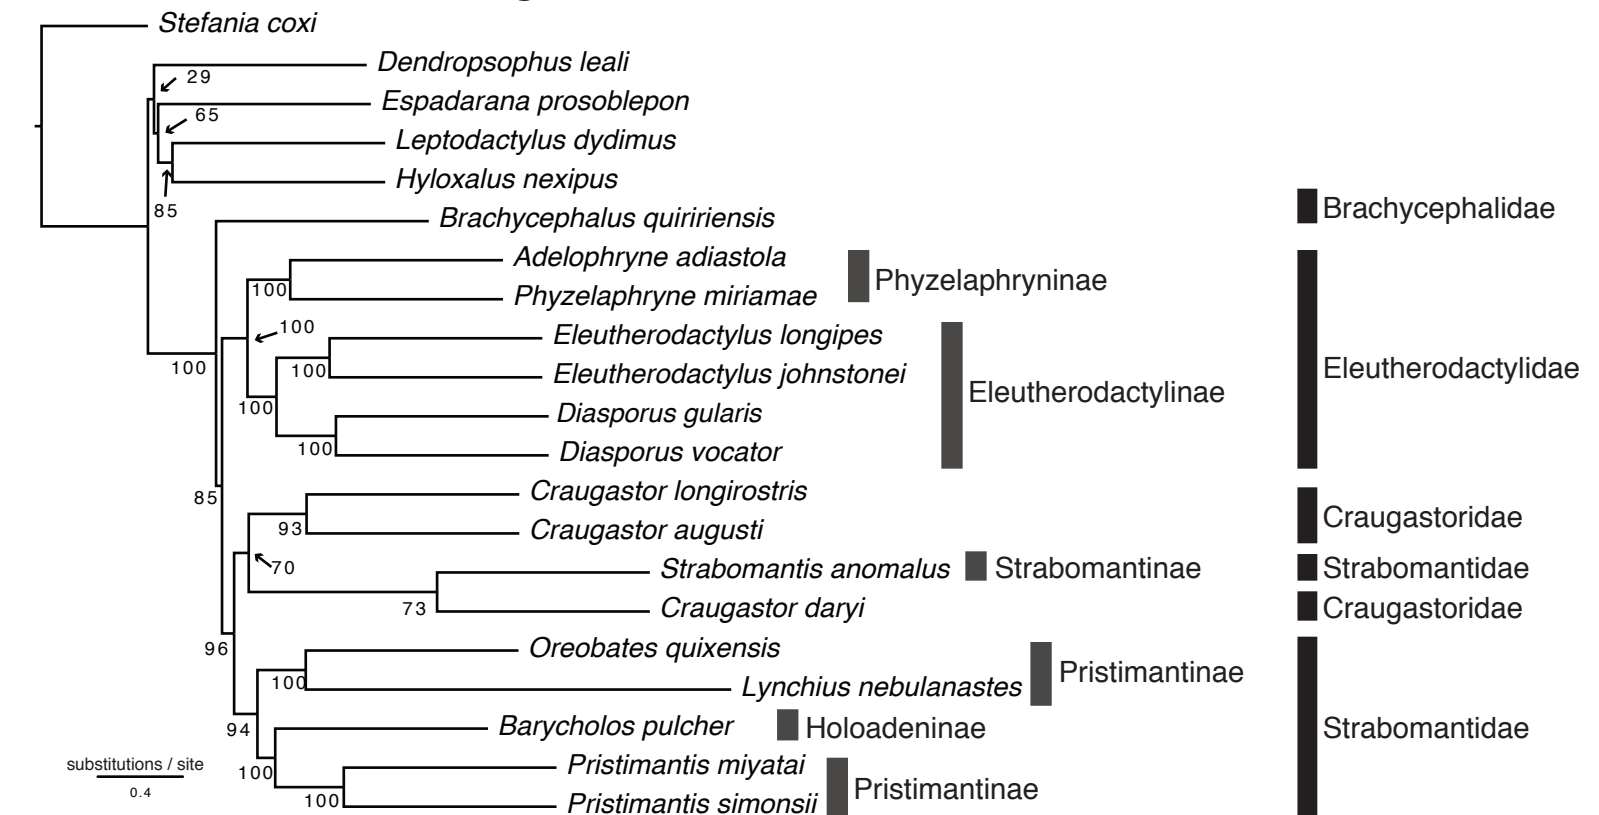

Supplement: Supplementary file 2 [file 1]
